# Supplementary material for: Changes at the nuclear lamina alter binding of pioneer factor Foxa2 in aged liver
Source: PubMed Central journal article supplement (PMC5946061; doi:10.1111/acel.12742), 2018-02-27
Supplement: ACEL-17-e12742-s001.pdf [file ACEL-17-e12742-s001.pdf]

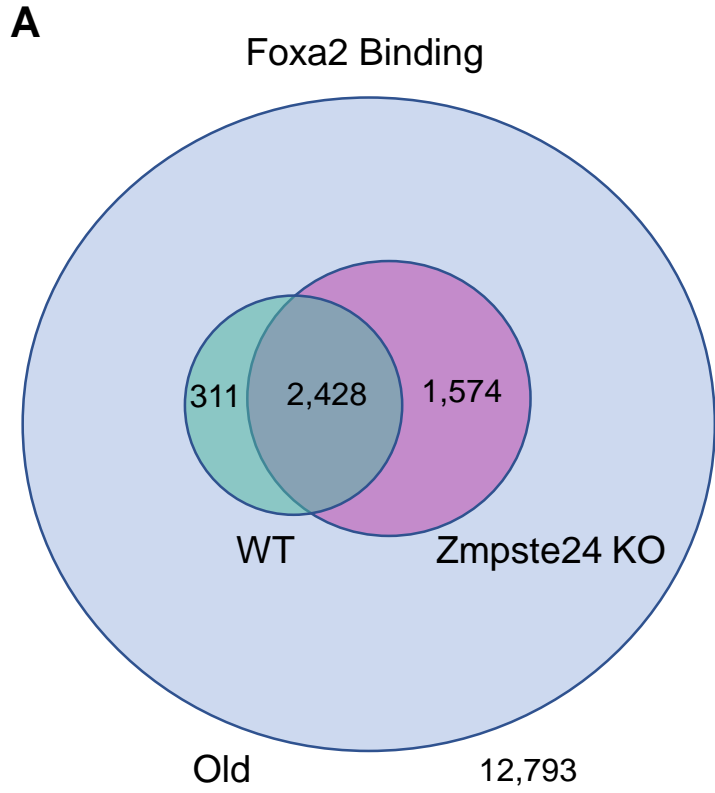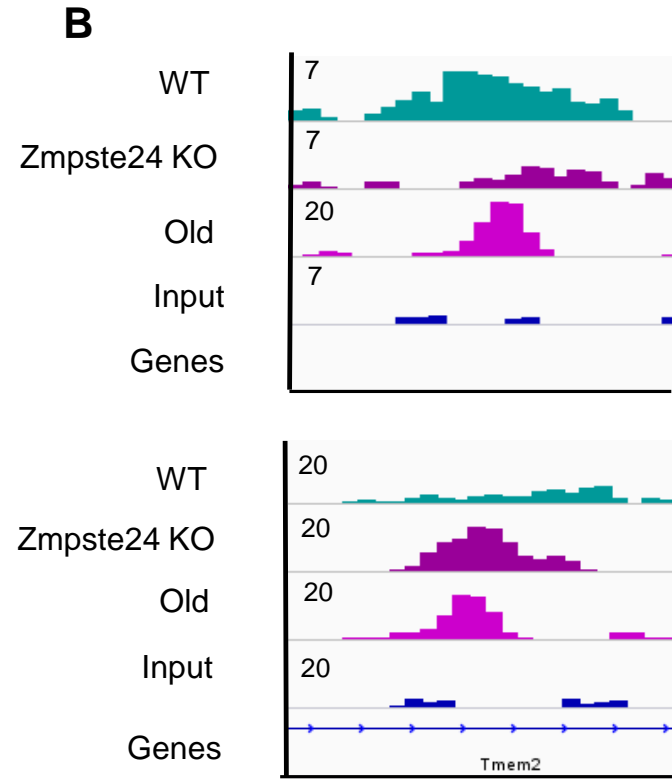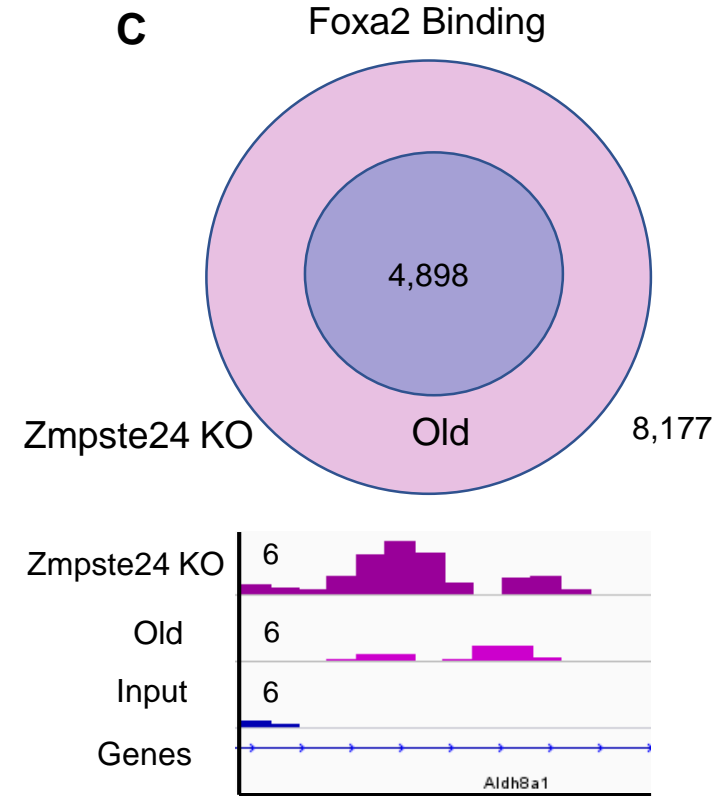

## ChEA 2016

| Index | Name                                      | P-value    |
|-------|-------------------------------------------|------------|
| 1     | RXR_22158963_ChIP-Seq_LIVER_Mouse         | 7.334e-19  |
| 2     | LXR_22158963_ChIP-Seq_LIVER_Mouse         | 7.334e-19  |
| 3     | CLOCK_20551151_ChIP-Seq_293T_Human        | 4.009e-9   |
| 4     | PPARA_22158963_ChIP-Seq_LIVER_Mouse       | 4.785e-11  |
| 5     | MYB_21317192_ChIP-Seq_ERMYP_Mouse         | 8.331e-7   |
| 6     | ESR2_21235772_ChIP-Seq_MCF-7_Human        | 0.00005844 |
| 7     | RELA_24523406_ChIP-Seq_FIBROSARCOMA_Human | 0.00001207 |
| 8     | SALL1_21062744_ChIP-ChIP_HESCs_Human      | 0.003695   |
| 9     | ESR1_21235772_ChIP-Seq_MCF-7_Human        | 0.004061   |
| 10    | KDM2B_26808549_Chip-Seq_SUP-B15_Human     | 0.00002989 |

## WikiPathways 2016

| Index | Name                                             | P-value  |
|-------|--------------------------------------------------|----------|
| 1     | Translation Factors_Homo sapiens_WP107           | 0.002643 |
| 2     | mRNA processing_Mus musculus_WP310               | 0.003746 |
| 3     | Adipogenesis genes_Mus musculus_WP447            | 0.002928 |
| 4     | Fluoropyrimidine Activity_Homo sapiens_WP1601    | 0.003270 |
| 5     | Adipogenesis_Homo sapiens_WP236                  | 0.003221 |
| 6     | NRF2 pathway_Homo sapiens_WP2884                 | 0.006461 |
| 7     | Spinal Cord Injury_Homo sapiens_WP2431           | 0.007287 |
| 8     | mRNA Processing_Homo sapiens_WP411               | 0.01025  |
| 9     | Spinal Cord Injury_Mus musculus_WP2432           | 0.009531 |
| 10    | Neural Crest Differentiation_Homo sapiens_WP2064 | 0.01206  |

## NCI-Nature 2016

| Index | Name                                                                                                    | P-value   |
|-------|---------------------------------------------------------------------------------------------------------|-----------|
| 1     | FOXO1 transcription factor network_Homo sapiens_c51cda49-6192-11e5-8ac5-06603eb7f303                    | 0.0008760 |
| 2     | FOXA1 transcription factor network_Homo sapiens_aa3927b7-6192-11e5-8ac5-06603eb7f303                    | 0.001360  |
| 3     | FOXA2 and FOXA3 transcription factor networks_Homo sapiens_b6933be8-6192-11e5-8ac5-06603eb7f303         | 0.009984  |
| 4     | Retinoic acid receptors-mediated signaling_Homo sapiens_5797691b-6195-11e5-8ac5-06603eb7f303            | 0.01525   |
| 5     | ALK1 signaling events_Homo sapiens_fcc72679-6186-11e5-8ac5-06603eb7f303                                 | 0.01116   |
| 6     | Validated targets of C-MYC transcriptional repression_Homo sapiens_6bbdafa6-6196-11e5-8ac5-06603eb7f303 | 0.03074   |
| 7     | AP-1 transcription factor network_Homo sapiens_3ce2f9c5-6189-11e5-8ac5-06603eb7f303                     | 0.04092   |

## TRANSFAC and JASPAR PWMs

| Index | Name            | P-value          |         |
|-------|-----------------|------------------|---------|
| 1     | NFYB (human)    | 0.0002213        |         |
| 2     | TCFAP2A (human) | 0.002096         |         |
| 3     | NKX3-1 (human)  | 0.01167          |         |
| 4     | CRTC3 (human)   | 0.009013         |         |
| 5     | MAPK14 (human)  | 0.01011          |         |
| 6     | CREB1 (mouse)   | 0.01039          |         |
| 7     | RXRA (human)    | Nuclear Receptor | 0.01144 |
| 8     | XBP1 (human)    |                  | 0.02090 |
| 9     | RARA (human)    | Nuclear Receptor | 0.02881 |
| 10    | FOXO3A (human)  | Forkhead         | 0.03436 |

Figure S2
